# Supplementary material for: Efficient H2O2 production from a SrTiO3-based thermoelectrocatalyst for harvesting low-grade waste heat
Source: Royal Society of Chemistry journal article supplement (doi:10.1039/d4cc04643a), 2024-01-01
Supplement: d4cc04643a1.pdf [file d4cc04643a1.pdf]

## Supporting Information

### Efficient H<sub>2</sub>O<sub>2</sub> Production from SrTiO<sub>3</sub>-based Thermoelectrocatalyst for Harvesting Low-Grade Waste Heat

Qian Yang,<sup>‡ab</sup> Yuheng Gu,<sup>‡a</sup> Yucen Liu,<sup>‡a</sup> Xin Wang,<sup>c</sup> Shun Li,<sup>a</sup> Jianming Zhang,<sup>a</sup> Weishu Liu,<sup>\*d</sup> Long Zhang<sup>\*a</sup> and Yuqiao Zhang<sup>\*a</sup>

*a. Institute of Quantum and Sustainable Technology (IQST), School of Chemistry and Chemical Engineering, Jiangsu University, Zhenjiang, Jiangsu, 212013 China.*

*E-mail: yuqiaozhang@ujs.edu.cn (Y.Q. Zhang), longzhang@ujs.edu.cn (L. Zhang)*

*b. Foshan (Southern China) Institute for New Materials, 528200, Foshan, Guangdong, China*

*c. Public Experiment and Service Center, Jiangsu University, Zhenjiang, Jiangsu, 212013 China.*

*d. Department of Materials Science and Engineering, Southern University of Science and Technology, Shenzhen, 518055, China*

*E-mail: liuws@sustech.edu.cn (W. Liu)*

<sup>‡</sup> Q. Yang, Y. Gu, and Y. Liu contributed equally to this work.

## Sample preparation

All catalyst powders were synthesized by the solid-phase reaction method at 1100 °C for 3 hours. Prior to calcination, stoichiometrically weighed SrCO<sub>3</sub>, TiO<sub>2</sub> and Nb<sub>2</sub>O<sub>3</sub> powders (99.99%, Aladdin Co. Ltd.) were mixed via a wet ball milling process at 300 rpm for 12 hours with ethanol as the medium, followed by drying at 70 °C. To induce oxygen vacancies, the resulting pure SrTiO<sub>3</sub> powders were annealed at 800 °C under a flow of mixed H<sub>2</sub>/Ar gas (5% H<sub>2</sub> and 95% Ar). The electron doping concentration was adjusted by varying the annealing duration to 9, 12, and 21 hours (hereafter denoted as STO-Ov1, STO-Ov2, and STO-Ov3). In case of Nb substituted SrTiO<sub>3</sub> powders, 2 mol%, 5 mol% and 10 mol% of Nb substitution at the Ti site was applied (SrTi<sub>1-x</sub>Nb<sub>x</sub>O<sub>3</sub>,  $x = 0.02, 0.05, 0.1$ , hereafter denoted as STNO-0.02, STNO-0.05, and STNO-0.1).

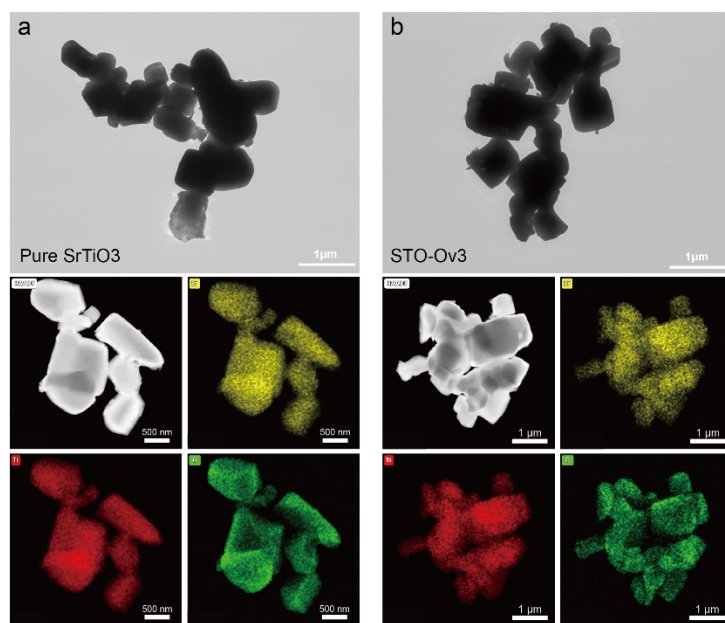

**Figure S1.** Transmission electron microscopy (TEM) images of SrTiO<sub>3</sub> powders before (a) and after (b) post-annealing.

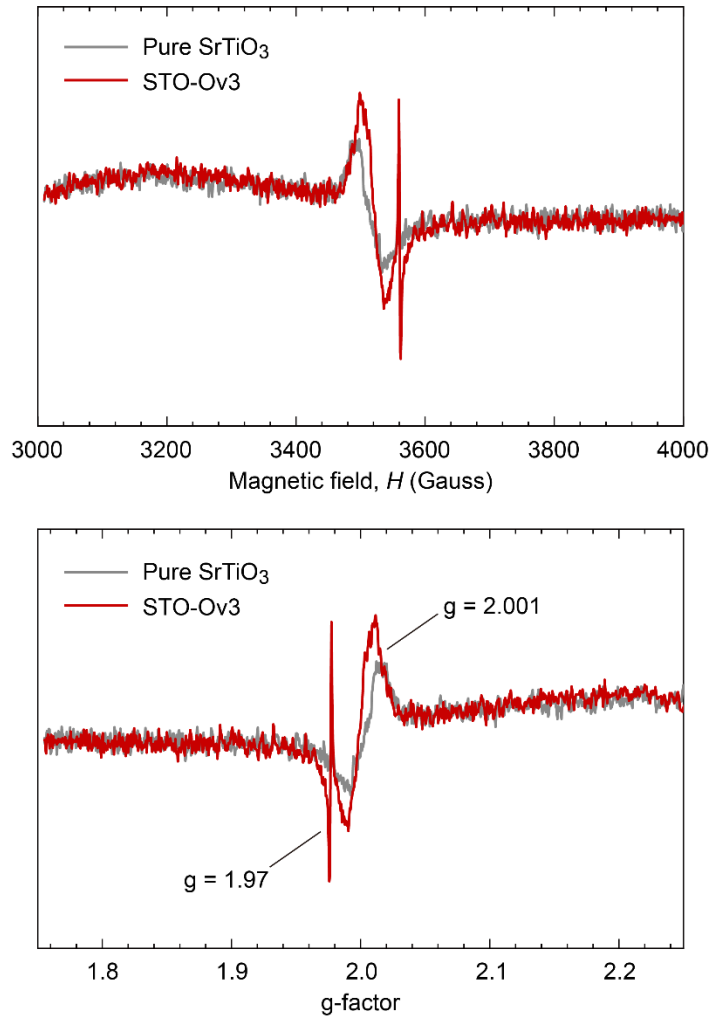

**Figure S2. Electron paramagnetic resonance (EPR) spectra of pure SrTiO<sub>3</sub> and STO-Ov3 samples.** EPR signals attributed to oxygen vacancy and Ti<sup>3+</sup> can be detected at  $g = 2.001$  and  $1.97$ .

**Fig. S2** shows the electron paramagnetic resonance (EPR) results of pure SrTiO<sub>3</sub> and STO-Ov3 samples. The g factor can be calculated by following relations from magnetic field ( $H$ ),

$$g = hv / \beta H$$

where  $h$  is Plank constant ( $= 6.63 \times 10^{-34}$  J s),  $v$  is frequency,  $\beta$  is Bohr magneton ( $9.27 \times 10^{-24}$  A m<sup>2</sup>) and  $H$  is magnetic field strength.

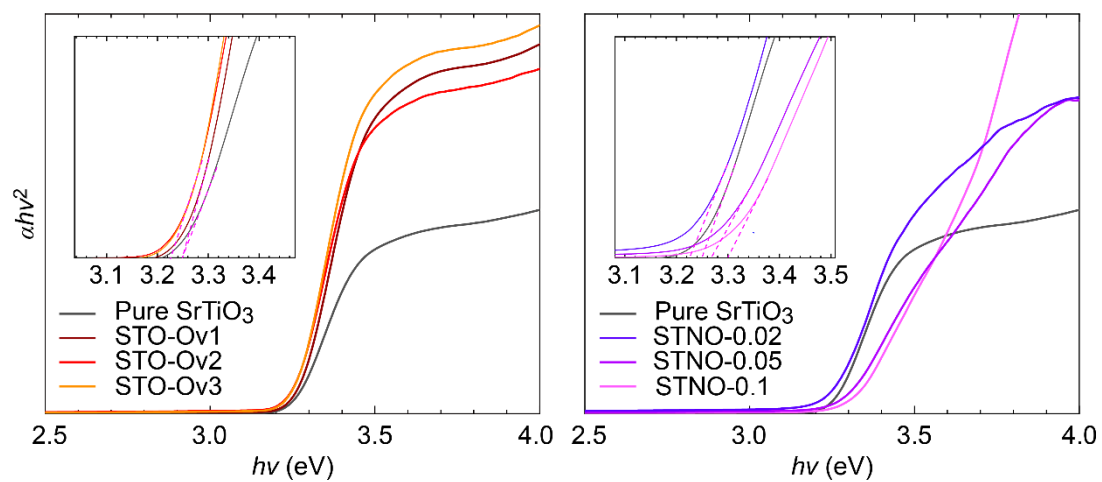

**Figure S3.** Solid UV characterization of SrTiO<sub>3</sub> powders with different oxygen vacancies (Pure-STO, STO-Ov1, STO-Ov2 and STO-Ov3) and Nb substitutions (2 mol%, 5 mol% and 10 mol% substitutions abbreviated as STNO-0.02, STNO-0.05 and STNO-0.1, respectively). All the samples show an almost constant optical band gap of ~3.2 eV, corresponding to the pristine SrTiO<sub>3</sub>.

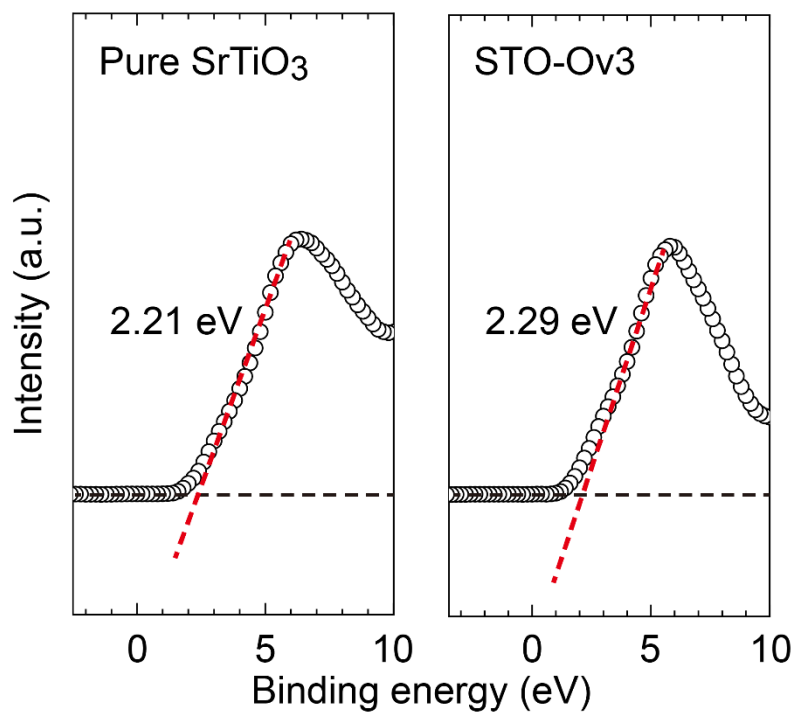

**Figure S4.** XPS valence band spectra of pure SrTiO<sub>3</sub> and STO-Ov3 powders. The valence band energies are measured to be 2.21 eV for pure SrTiO<sub>3</sub> and 2.29 eV for STO-Ov3, showing minimal variation between these two samples.

**Table S1. Specific area and porosity of electron doped SrTiO<sub>3</sub> powders.**

| Sample No.              | Specific area (m <sup>2</sup> g <sup>-1</sup> ) |
|-------------------------|-------------------------------------------------|
| Pure-SrTiO <sub>3</sub> | 13.57                                           |
| STO-Ov1                 | 11.93                                           |
| STO-Ov2                 | 12.08                                           |
| STO-Ov3                 | 13.63                                           |
| STNO-0.02               | 6.87                                            |
| STNO-0.05               | 13.99                                           |
| STNO-0.1                | 8.11                                            |

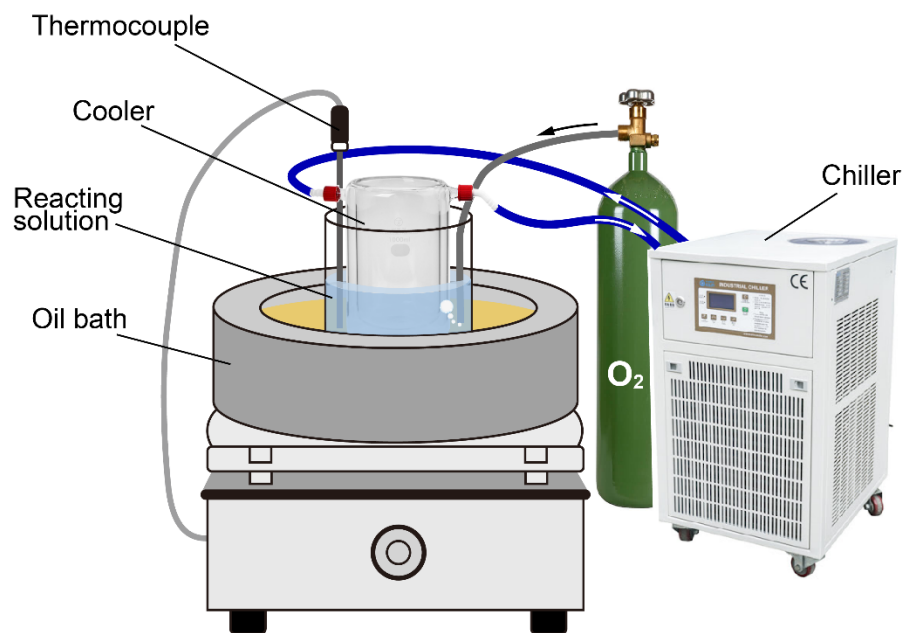

**Figure S5.** Schematic illustration of the custom-designed thermoelectrocatalytic (TECatal) reactor.

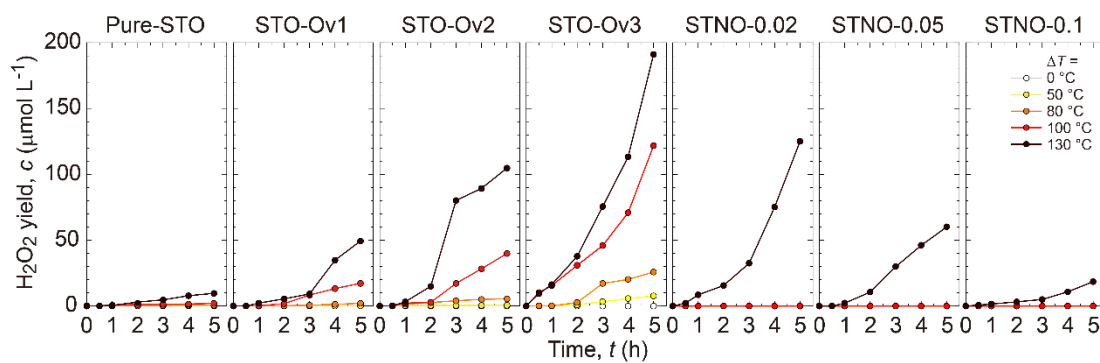

**Figure S6.** Time-dependent TECatal H<sub>2</sub>O<sub>2</sub> production rate of SrTiO<sub>3</sub> powders with different oxygen vacancies (Pure-STO, STO-Ov1, STO-Ov2 and STO-Ov3) and Nb substitutions (2 mol%, 5 mol% and 10 mol% substitutions abbreviated as STNO-0.02, STNO-0.05 and STNO-0.1, respectively) at the temperature gradient ( $\Delta T$ ) ranging from 0 to 130 °C.



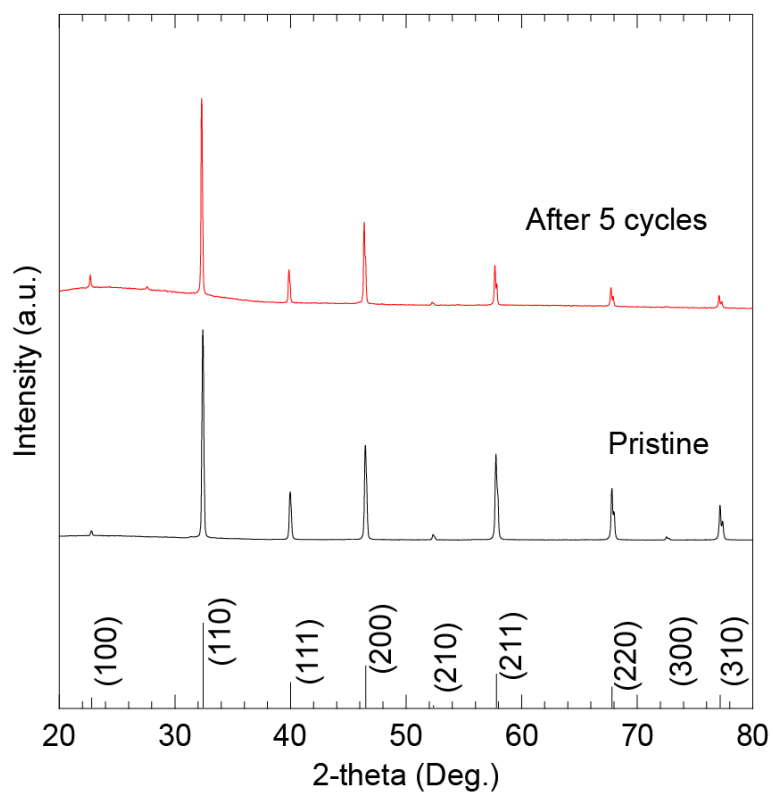

**Figure S7. X-ray diffraction (XRD) patterns of oxygen vacancy doped SrTiO<sub>3</sub> powders before and after 5 cycles' thermoelectrocatalysis (TECatal).** No obvious phase change can be detected suggesting a good composition stability of SrTiO<sub>3</sub> powders.

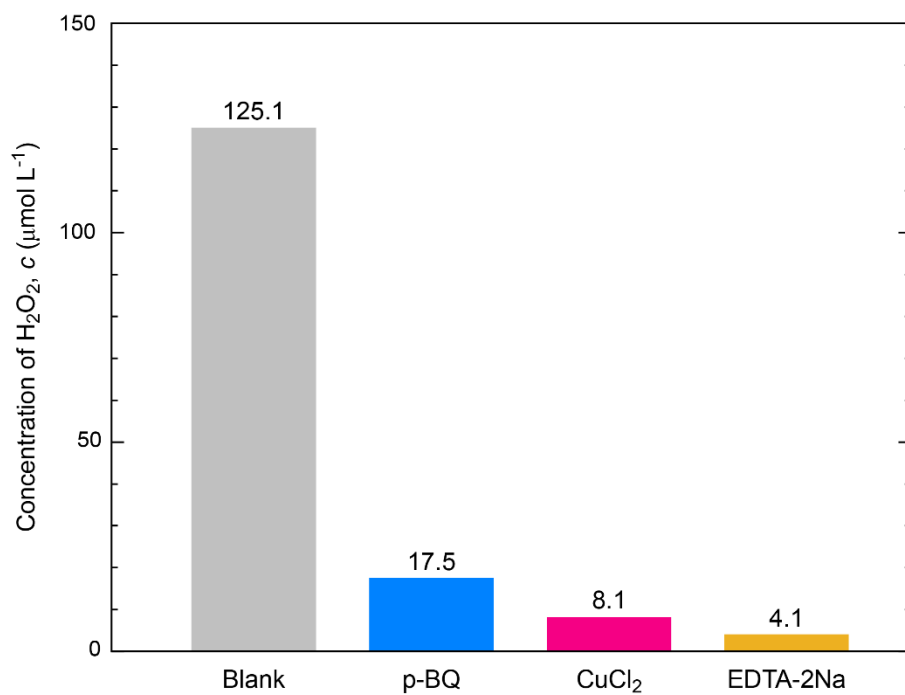

**Figure S8.** H<sub>2</sub>O<sub>2</sub> yield of 2 mol% Nb substituted SrTiO<sub>3</sub> powder (STNO-0.02) with EDTA-2Na, CuCl<sub>2</sub> and p-benzoquinone (p-BQ) as hole scavenger, electron scavenger and superoxide ( $\cdot\text{O}_2^-$ ) scavenger, respectively. Significant suppression of H<sub>2</sub>O<sub>2</sub> production can be observed at the presence of scavengers.a
